# Supplementary material
Source: PubMed Central journal article supplement (PMC4566102)

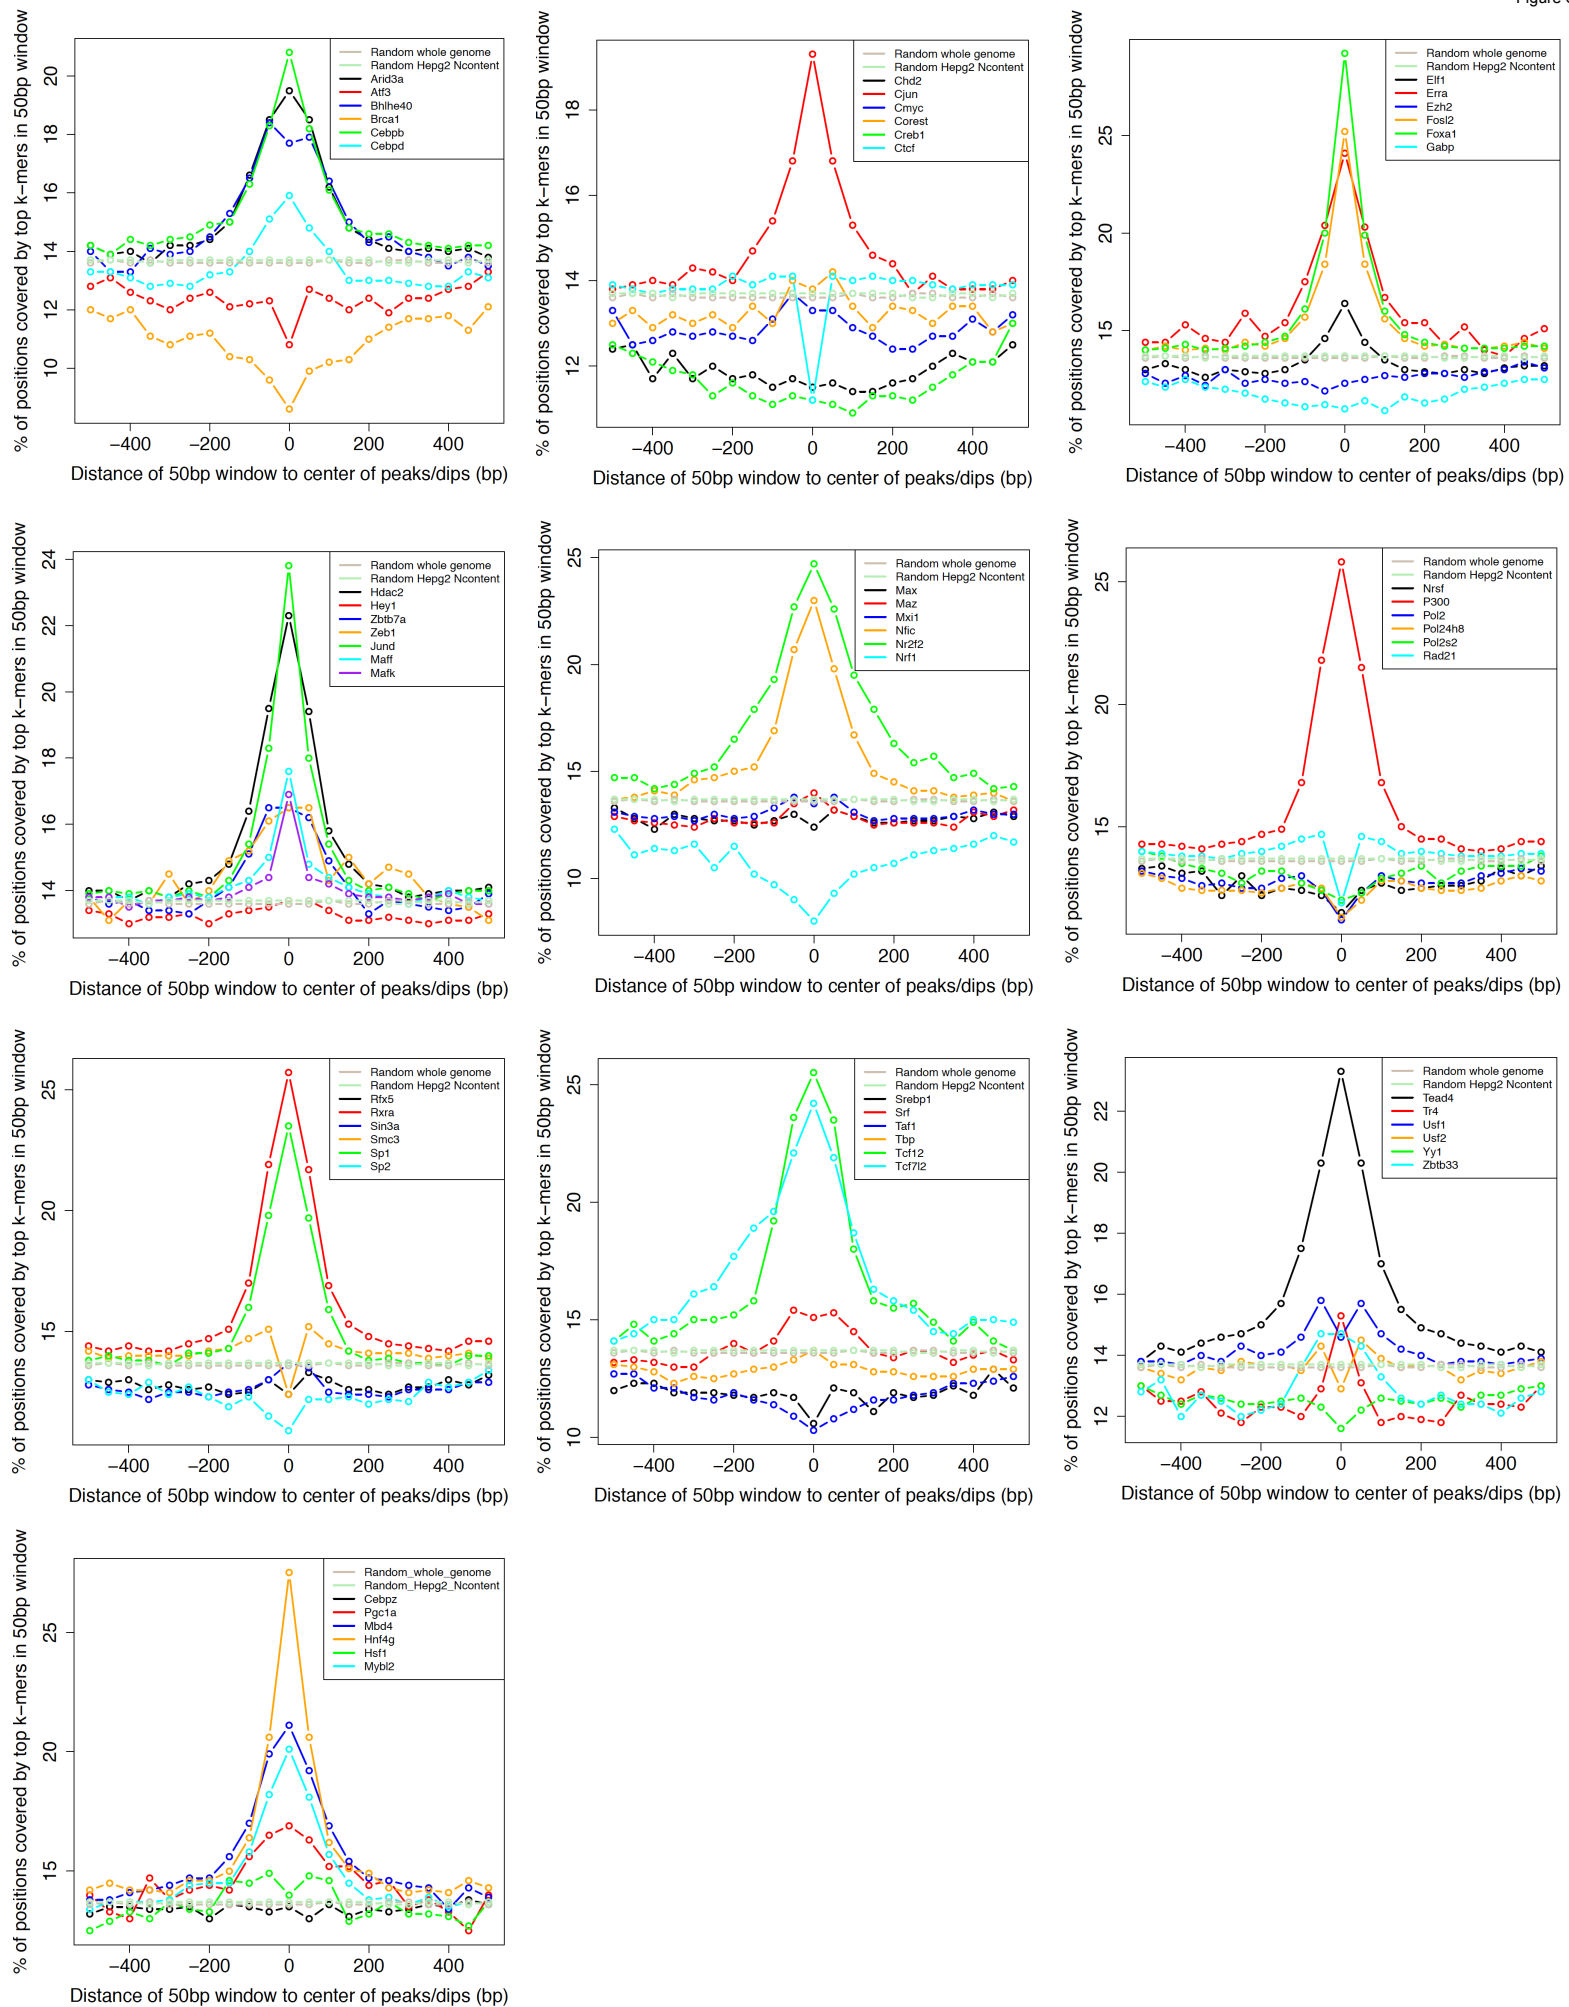

Supplement: supp_msv118_FigureS8_EnhancerMutations_LiAndOvcharenko.pdf [file supp_msv118_FigureS8_EnhancerMutations_LiAndOvcharenko.pdf]

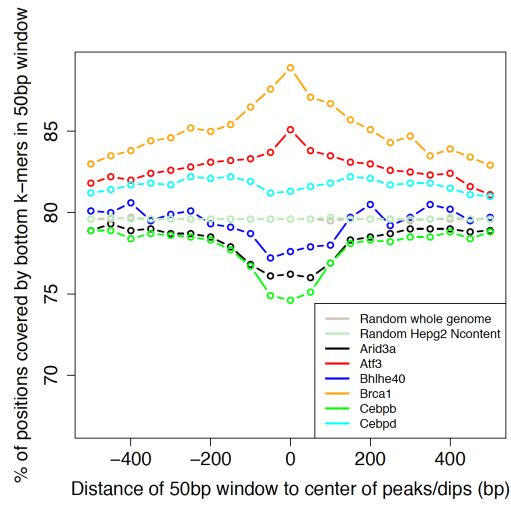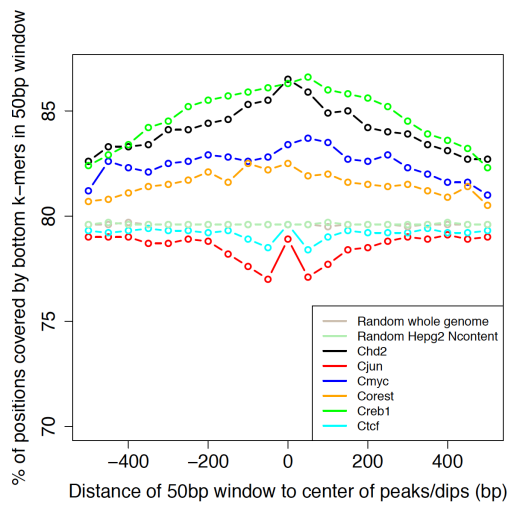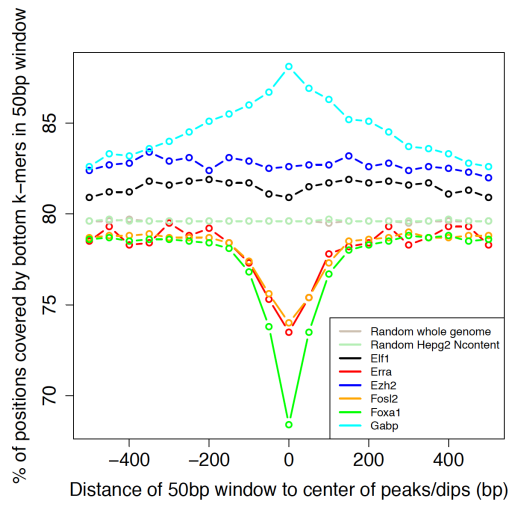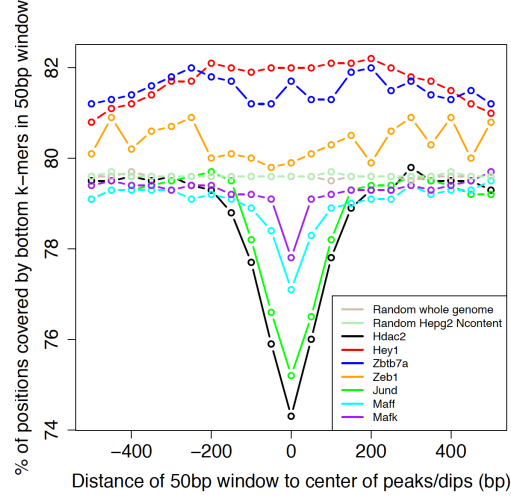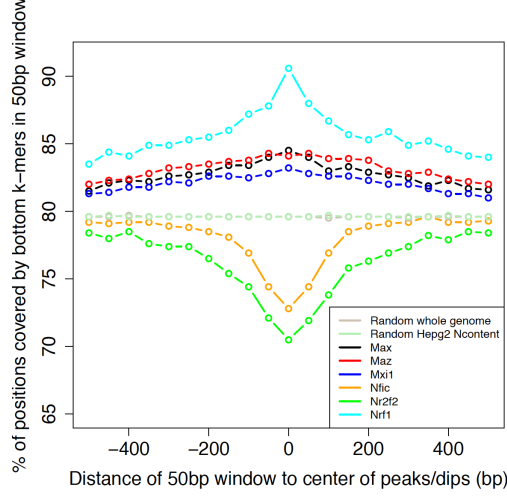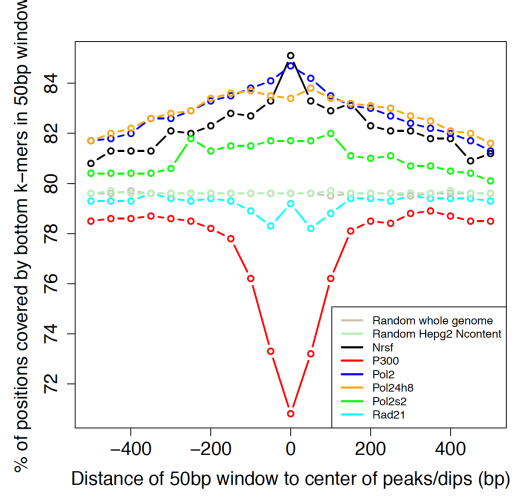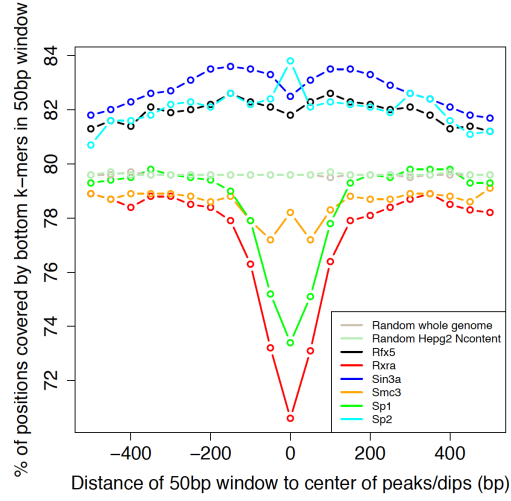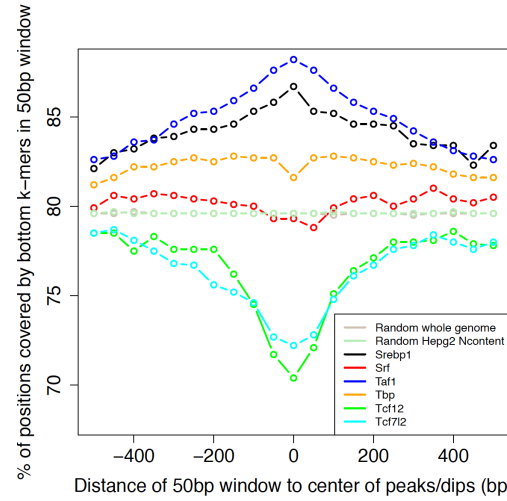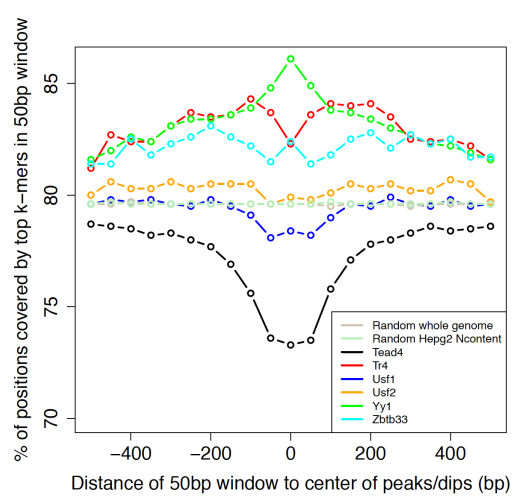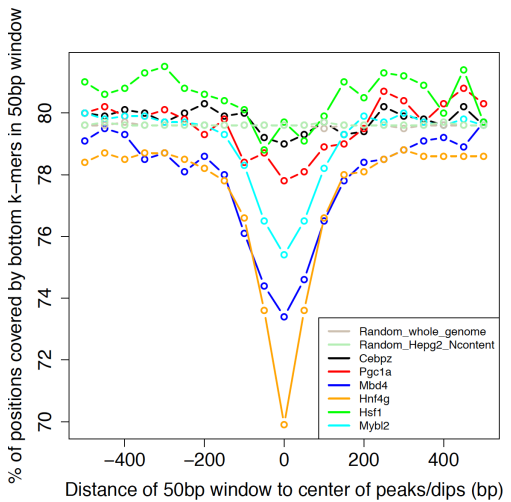

Supplement: supp_msv118_FigureS9_EnhancerMutations_LiAndOvcharenko.pdf [file supp_msv118_FigureS9_EnhancerMutations_LiAndOvcharenko.pdf]
